1 **The cellular NMD pathway restricts Zika virus infection and is targeted by the viral capsid**  
2 **protein**

3

4 Fontaine KA<sup>1</sup>, Leon KE<sup>1,2</sup>, Khalid MM<sup>1</sup>, Jimenez-Morales D<sup>1,3</sup>, Tomar S<sup>1</sup>, Dunlap M<sup>1</sup>, Kaye JA<sup>1</sup>,  
5 Shah PS<sup>3,6</sup>, Finkbeiner S<sup>1,4</sup>, Krogan NJ<sup>1,3</sup> and Ott M<sup>1,5</sup>.

6

7 <sup>1</sup>Gladstone Institutes, San Francisco, CA, <sup>2</sup>Medical Scientist Training Program, University of  
8 California, San Francisco, CA, <sup>3</sup>Quantitative Biology Institute, Department of Cellular and  
9 Molecular Pharmacology, University of California, San Francisco, CA, <sup>4</sup>Department of Neurology  
10 and Physiology, University of California, San Francisco, CA, <sup>5</sup>Department of Medicine,  
11 University of California, San Francisco, CA

12

13 <sup>6</sup>Present address: Departments of Chemical Engineering and Microbiology and Molecular  
14 Genetics, University of California, Davis, CA

15

16 **Abstract**

17 **Zika virus (ZIKV) infection of neural progenitor cells (NPCs) *in utero* is associated with**  
18 **neurological disorders, such as microcephaly<sup>1-3</sup>, but a detailed molecular understanding**  
19 **of ZIKV-induced pathogenesis is lacking. Here we show that *in vitro* ZIKV infection of**  
20 **human cells, including NPCs, causes disruption of the nonsense-mediated mRNA decay**  
21 **(NMD) pathway. NMD is a cellular mRNA surveillance mechanism that is required for**  
22 **normal brain size in mice<sup>4-6</sup>. Using affinity purification-mass spectrometry, we identified**  
23 **multiple cellular NMD factors that bind to the viral capsid protein, including the central**  
24 **NMD regulator up-frameshift protein 1 (UPF1)<sup>7</sup>. Endogenous UPF1 interacted with the**  
25 **viral capsid protein in co-immunoprecipitation experiments, and capsid expression post-**  
26 **transcriptionally downregulated UPF1, a process that we confirmed occurs during *de***

27 ***novo* ZIKV infection. A further decrease in UPF1 levels by RNAi significantly enhanced**  
28 **ZIKV infection in NPC cultures. RNA electrophoretic mobility shift assays with UPF1-**  
29 **expressing cell lysates showed binding to ZIKV RNA *in vitro*, and UPF1 protein in ZIKV-**  
30 **infected NPCs colocalized with viral double-stranded RNA replication intermediates.**  
31 **Collectively, our data support a model where ZIKV, via the capsid protein, has evolved a**  
32 **strategy to dampen antiviral activities of NMD<sup>8,9</sup>, which subsequently contributes to**  
33 **neuropathology *in vivo*.**

34

### 35 **Main**

36 ZIKV is a mosquito-borne RNA virus that belongs to the *Flaviviridae* family. First isolated  
37 in Uganda in 1947, ZIKV remained relatively obscure for decades following its discovery  
38 because infection was associated with only mild disease. However, more severe clinical  
39 manifestations, including microcephaly, have been observed during the recent spread of ZIKV  
40 through the Americas<sup>10</sup>. While it is now established that ZIKV infection during pregnancy is a  
41 causative agent of microcephaly<sup>11</sup>, the molecular mechanisms underlying ZIKV-induced  
42 neuropathogenesis remain largely unknown.

43 Microcephaly has been linked to genetic mutations that result in the impairment of the  
44 NMD pathway<sup>4-6</sup>. While NMD was initially found to serve as a quality control system that  
45 destroys transcripts containing premature termination codons, the pathway also targets a  
46 broader range of RNA substrates, including viral RNAs<sup>7-9,12,13</sup>. As ZIKV has an RNA genome,  
47 and we previously described perturbations of the NMD pathway in cells infected with hepatitis C  
48 virus<sup>14</sup>, we hypothesized that ZIKV infection manipulates the cellular NMD pathway.

49 To determine if ZIKV infection affects NMD, we infected human hepatic cells (the Huh7  
50 cell line) and human induced pluripotent stem cell (iPSC)-derived NPCs, two relevant target cell  
51 types, with ZIKV for 48 h. We isolated total RNA from infected cells and measured mRNA levels  
52 of three canonical NMD substrates: asparagine synthetase (ASNS), cysteinyl-tRNA synthetase

53 (CARS), and SR protein SC35<sup>14</sup>. ASNS, CARS, and SC35 transcripts were significantly  
54 elevated in Huh7 cells and NPCs following infection with Asian lineage ZIKV strain P6-740 (Fig.  
55 1a). Levels of NMD substrates were also elevated in Huh7 cells infected with the contemporary  
56 ZIKV clinical isolate PRVABC59 (Puerto Rico, 2015)(Fig. 1a). We found that ZIKV-induced  
57 increase in NMD transcripts did not reflect a global increase in transcription, as mRNA levels of  
58 housekeeping genes, including glyceraldehyde 3-phosphate dehydrogenase (GAPDH), were  
59 not altered in infected cells (Fig. 1a). Together, these results indicate that ZIKV disrupts the  
60 NMD pathway during infection.

61 NMD substrates are regulated through the activity of UPF1, an evolutionarily conserved  
62 ATP-dependent RNA helicase. UPF1 plays a central role in the NMD pathway by linking the  
63 translation termination event to the assembly of a surveillance complex, resulting in NMD  
64 activation<sup>15</sup>. To determine if ZIKV infection more broadly affects NMD, we utilized two publicly  
65 available RNA sequencing (RNA-Seq) datasets to compare genome-wide transcriptional  
66 alterations found during ZIKV infection<sup>16</sup> to those found following UPF1 knockdown<sup>17</sup>. As shown  
67 in Figure 1b, there is a significant overlap in upregulated genes between these two datasets.  
68 Interestingly, several of the overlapping genes are involved in cell cycle arrest and induction of  
69 apoptosis, two conditions linked to ZIKV-associated neuropathology<sup>1</sup>. These genes include DNA  
70 damage-inducible transcript 3 (DDIT3)<sup>18</sup> and growth arrest and DNA damage-inducible protein  
71 45 alpha and beta (GADD45A and GADD45B, respectively)<sup>19</sup>. Via quantitative real-time RT-  
72 PCR, we confirmed that transcripts of each were upregulated following infection of Huh7 cells  
73 with ZIKV PRVABC59, while the mRNA levels of the housekeeping genes GAPDH,  
74 hypoxanthine phosphoribosyltransferase 1 (HPRT1), and lactate dehydrogenase A (LDHA)  
75 were not elevated (Fig. 1c). Combined, these data show that ZIKV infection is associated with  
76 dysregulated expression of NMD substrates relevant to ZIKV-mediated neuropathogenesis.

77 We previously showed that the core protein of HCV and capsid protein of the related  
78 flaviviruses dengue virus and West Nile virus interact with within bgn homolog (WIBG/PYM1),

79 a component of the exon junction complex (EJC) associated with NMD<sup>14</sup>. To examine potential  
80 interactions between ZIKV and the NMD pathway, we separately analyzed data generated from  
81 an affinity purification-mass spectrometry (AP-MS) screen to specifically query whether the  
82 capsid protein of ZIKV interacts with NMD-associated host factors (Shah et al., submitted).  
83 ZIKV-host protein-protein interaction (PPI) maps were generated in HEK293T cells using ZIKV  
84 proteins from the Ugandan 1947 strain MR 766 or the French Polynesian 2013 strain H/PF/2013  
85 as bait proteins. From this analysis, we found that ZIKV capsid proteins interacted with several  
86 factors of the NMD pathway, including multiple members of the EJC complex, as well as UPF1  
87 and UPF3B (UPF3B is an NMD effector that stimulates the helicase activity of UPF1) (Fig. 2a).  
88 Importantly, the NMD host factors that interact with each of the two different capsid proteins  
89 greatly overlapped, revealing that the interaction between capsid and the NMD pathway is  
90 conserved across the Asian and African lineages of ZIKV (Fig. 2a).

91 Next, we validated the binding of ZIKV capsid to UPF proteins by co-  
92 immunoprecipitating Flag-tagged capsid protein with endogenous UPF3B or UPF1 in HEK293T  
93 cells. Both UPF3B and UPF1 proteins co-immunoprecipitated with ZIKV capsid, confirming the  
94 AP-MS results (Fig. 2b,c, respectively). In addition, ZIKV capsid colocalized with endogenous  
95 UPF1 in transfected Huh7-Lunet cells, as visualized and quantified by confocal  
96 immunofluorescent microscopy and three-dimensional (3D) reconstruction analysis (Mander's  
97 colocalization coefficient of ~57%) (Fig. 2d).

98 Surprisingly, we consistently observed a decrease in UPF1, but not UPF3B, protein  
99 levels in the input lysate of ZIKV capsid-transfected cells, pointing to a specific perturbation of  
100 UPF1 expression by ZIKV capsid (Fig. 2c). To confirm that UPF1 protein levels are  
101 dysregulated during *de novo* ZIKV infection, we performed western blot analysis of infected  
102 Huh7 cells and NPCs. Cellular UPF1 protein levels were consistently downregulated by ~50% in  
103 ZIKV-infected Huh7 cells, whereas a ~25% reduction was observed in ZIKV-infected NPCs (Fig.  
104 3a,b, respectively). This difference in UPF1 downregulation mirrors the difference in infection



105 efficiencies achieved in these two cell systems. UPF1 transcript levels were not decreased in  
106 ZIKV-infected cells or following capsid overexpression, suggesting that UPF1 is post-  
107 transcriptionally downregulated during ZIKV infection (Fig. 3c,d, respectively).

108 We hypothesized that UPF1 serves as a restriction factor of ZIKV and is inactivated in  
109 infected cells to promote ZIKV propagation. To test this hypothesis, we decreased UPF1  
110 expression prior to ZIKV infection by transfecting NPCs with either non-targeting siRNA or a  
111 pool of UPF1-specific siRNAs. We then infected the transfected cells with ZIKV and measured  
112 viral RNA levels, as well as infectious titers, 48 h post-infection (hpi). UPF1 knockdown was  
113 successful in siRNA-treated cells, as confirmed by western blot analysis (Fig. 4a). The depletion  
114 of UPF1 in NPCs prior to infection resulted in a significant increase in both ZIKV RNA levels and  
115 infectious virus production (Fig. 4b,c respectively), supporting the model that expression of  
116 UPF1 restricts ZIKV infection at or before the RNA replication stage. During viral RNA  
117 replication, double-stranded RNA (dsRNA) intermediates are generated, which can be  
118 visualized with a specific antibody<sup>20</sup>. Using confocal microscopy and 3D reconstruction  
119 analyses, we observed no significant difference in the number and size of dsRNA foci when we  
120 compared ZIKV-infected, UPF1-depleted NPCs to ZIKV-infected cells expressing UPF1  
121 (Supplemental Fig. 1). Instead, we found a significant increase in the number of infected cells in  
122 NPC cultures when UPF1 was depleted, underscoring that UPF1 expression affects the  
123 permissivity of NPCs to ZIKV infection (Fig. 4d). Interestingly, endogenous UPF1 colocalized  
124 with viral dsRNA with ~54% of the 3D-reconstructed RNA replication loci also scoring positive  
125 for UPF1 fluorescence, indicating that UPF1 targets ZIKV at the RNA replication stage (Fig. 4e).  
126 Furthermore, a chemiluminescent RNA electrophoretic mobility shift assay (EMSA) with cell  
127 lysates and full-length biotinylated ZIKV RNA resulted in a marked shift in ZIKV RNA gel  
128 migration that was significantly enhanced when UPF1 was overexpressed (Fig. 4f). Combined,  
129 these data support a model where UPF1, together with its cellular partners, directly targets ZIKV  
130 RNA possibly rendering it for destruction. Of note, we observed several faster migrating RNA-

131 protein complexes in these assays, especially when UPF1 was overexpressed, but further  
132 studies are needed to conclusively show UPF1-dependent processing of ZIKV RNA.

133 In summary, we identified the NMD pathway as a restriction mechanism for ZIKV  
134 infection in human NPCs. NMD was partially inactivated in ZIKV-infected NPCs through  
135 expression of the viral capsid protein and the resulting downregulation of host UPF1 protein  
136 levels. As further weakening NMD by depleting UPF1 results in a marked increase in the  
137 number of infected cells, we propose a model in which an “arms race” between cellular NMD  
138 and ZIKV determines whether a cell is successfully infected (Figure 4g). The downregulation of  
139 UPF1 by capsid during ZIKV infection may be limited by toxic effects of NMD impairment, as  
140 illustrated by the upregulation of genes involved in cell cycle growth arrest and apoptosis.  
141 Indeed, ZIKV-induced NMD impairment may contribute to severe neuropathology and  
142 microcephaly development, as documented in mice haploinsufficient for NMD factors<sup>4-6</sup>. Studies  
143 are ongoing to determine the precise molecular mechanisms of ZIKV capsid-induced UPF1  
144 downregulation and the processing of ZIKV RNA by cellular NMD. This research may lead to  
145 new therapeutic approaches, as reinforcement of the antiviral properties of the NMD pathway is  
146 expected to enhance resistance of NPCs to ZIKV infection and could promote normal  
147 neurodevelopment in infected fetuses.

148

## 149 **Methods**

150 **Viruses and cells.** Two Asian lineage strains of ZIKV, P6-740 (ATCC VR-1845) and  
151 PRVABC59 (ATCC VR-1843), were used for all experiments. ZIKV stocks were propagated in  
152 Vero cells (ATCC) and titers were determined by plaque assays on Vero cells. Huh7 cells  
153 (ATCC), Huh7-Lunet cells (Ralf Bartenschlager, Heidelberg University) and Vero cells were  
154 maintained in Dulbecco’s Modified Eagle’s Medium (DMEM) with 10% fetal bovine serum (FBS),  
155 2 mM L-glutamine, 100 U/mL penicillin, and 100 µg/mL streptomycin. HEK293T cells (ATCC)  
156 were maintained in DMEM/H21 medium supplemented with 10% FBS, 100 U/mL penicillin, 100

157  $\mu\text{g/mL}$  streptomycin, and 1 mM sodium pyruvate or DMEM with 10% FBS, 2 mM L-glutamine,  
158 100 U/mL penicillin, and 100  $\mu\text{g/mL}$  streptomycin. Human iPSC-derived NPCs were generated  
159 and maintained as described previously<sup>21</sup>. All of the human fibroblast cell lines used to generate  
160 iPSCs came from the Coriell Institute for Medical Research and Yale Stem Cell Center. The  
161 iPSCs used in these studies were the CTRL2493nXX, CS2518nXX, and Cs71iCTR-20nXX  
162 lines. CTRL2493nXX was derived from the parental fibroblast line ND31845 that was biopsied  
163 from a healthy female at 71 years of age. CS2518nXX was derived from the parental fibroblast  
164 line ND30625 that was biopsied from a healthy male at 76 years of age. CS71iCTR-20nXX was  
165 derived from the parental fibroblast line ND29971 that was biopsied from a female at 61 years of  
166 age. For virus infections, NPCs plated on Matrigel-coated (Corning) multi-well plates or Huh7  
167 cells were infected with ZIKV at a multiplicity of infection (MOI) of 0.1 or 1 for 2 h at 37°C.  
168 Infected cells were harvested at 48 hpi for all analyses.

169  
170 **Affinity purification, mass spectrometry, and AP-MS scoring.** The ZIKV capsid open  
171 reading frames (ORFs) from the Ugandan 1947 strain MR 766 or the French Polynesian 2013  
172 strain H/PF/2013 were cloned into pCDNA4\_TO with a C-terminal 2xStrep II affinity tag for  
173 expression in human cells. The viral capsid proteins (three biological replicates), as well as GFP  
174 (two biological replicates) and empty vector (ten biological replicates) as negative controls, were  
175 expressed in HEK293T cells and affinity purifications were performed as previously described<sup>22</sup>.  
176 All lysates and affinity purified eluates were analyzed by western blot and silver stain PAGE to  
177 confirm expression and purification. Purified protein eluates were digested with trypsin for LC-  
178 MS/MS analysis. Samples were denatured and reduced in 2M urea, 10 mM  $\text{NH}_4\text{HCO}_3$ , 2 mM  
179 DTT for 30 min at 60°C, then alkylated with 2 mM iodoacetamide for 45 min at room  
180 temperature. Trypsin (Promega) was added at a 1:100 enzyme:substrate ratio and digested  
181 overnight at 37°C. Following digestion, samples were concentrated using C18 ZipTips

182 (Millipore) according to the manufacturer's specifications. Peptides were resuspended in 15  $\mu$ L  
183 of 4% formic acid and 3% ACN, and 1-2  $\mu$ L of sample was loaded onto a 75  $\mu$ m ID column  
184 packed with 25 cm of Reprosil C18 1.9  $\mu$ m, 120 $\text{\AA}$  particles (Dr. Maisch). Peptides were eluted  
185 into a Q-Exactive Plus (Thermo Fisher) mass spectrometer by gradient elution delivered by an  
186 Easy1200 nLC system (Thermo Fisher). The gradient was from 4.5% to 32% acetonitrile over  
187 53 minutes. All MS spectra were collected with orbitrap detection, while the 20 most abundant  
188 ions were fragmented by HCD and detected in the orbitrap. All data was searched against the  
189 SwissProt Human protein sequences, combined with ZIKV sequences and GFP. Peptide and  
190 protein identification searches, as well as label-free quantitation, were performed using the  
191 MaxQuant data analysis algorithm and all peptide and protein identifications were filtered to a  
192 1% false-discovery rate<sup>23, 24</sup>. SAINTq<sup>25</sup> was used to calculate the probability of bait-prey  
193 interactions for both Ugandan ZIKV capsid and French Polynesian ZIKV capsid against the  
194 negative controls, including GFP and empty vector, with protein intensities as input values. We  
195 applied a combined threshold of probability of interaction (AvgP) greater than 0.90 and  
196 Bayesian False Discovery Rate of less than 0.05.

197

198 **Quantitative real-time reverse transcription-PCR (qRT-PCR).** Total cellular RNA was  
199 isolated from Huh7 cells and NPCs using the RNeasy Mini Kit (Qiagen). cDNA was synthesized  
200 with oligo(dT)<sub>18</sub> (ThermoFisher Scientific) primers, random hexamer (Life Technologies)  
201 primers, and AMV reverse transcriptase (Promega). The cDNA was then used in SYBR Green  
202 PCR Master Mix (ThermoFisher Scientific) according to manufacturer's instructions and  
203 analyzed by qPCR (Bio-Rad ABI 7900). The primers used for ASNS, CARS, SC35 1.7, GAPDH,  
204 HPRT1, LDHA, and 18S rRNA have been described previously<sup>14</sup>. The additional primers used  
205 were ZIKV PRVABC59 forward primer 5'- GAG ACG AGA TGC GGT ACA GG -3', ZIKV  
206 PRVABC59 reverse primer 5'- CGA CCG TCA GTT GAA CTC CA -3', UPF1 forward primer 5'-  
207 CTG CAA CGG ACG TGG AAA TAC -3', UPF1 reverse primer 5'- ACA GCC GCA GTT GTA

208 GCA C -3', DDIT3 forward primer 5'- CTG CTT CTC TGG CTT GGC TG -3', DDIT3 reverse  
209 primer 5'- GCT CTG GGA GGT GCT TGT GA -3', GADD45A forward primer 5'- GAG CTC CTG  
210 CTC TTG GAG AC -3', GADD45A reverse primer 5'- GCA GGA TCC TTC CAT TGA GA -3',  
211 GADD45B forward primer 5'- TGA CAA CGA CAT CAA CAT C -3', and GADD45B reverse  
212 primer 5'- GTG ACC AGA GAC AAT GCA G -3'. Relative levels of each transcript were  
213 normalized by the delta threshold cycle method to the abundance of 18S rRNA or GAPDH, with  
214 mock-infected cells or vector-transfected cells set to 1.

215

216 **Western blot analysis.** Cells were lysed in RIPA lysis buffer (50mM Tris-HCl, pH 8, 150mM  
217 NaCl, 1% NP-40, 0.5% sodium deoxycholate, 0.1% SDS, supplemented with Halt™ protease  
218 inhibitor cocktail (ThermoFisher Scientific)) to obtain whole cell lysates or lysed using the NE-  
219 PER nuclear and cytoplasmic extraction kit (ThermoFisher Scientific) to obtain cytoplasmic and  
220 nuclear fractions. Proteins were separated by SDS-PAGE and transferred to nitrocellulose  
221 membranes (Bio-Rad). Blots were incubated with the indicated primary antibody: anti-UPF3B  
222 (ab134566, Abcam), anti-UPF1 (12040, Cell Signaling Technology, Inc.), anti-ZIKV Envelope  
223 (E) (GTX133314, GeneTex), anti-ZIKV Capsid (C) (GTX133304, GeneTex), anti-Flag (F7425,  
224 Sigma-Aldrich), and anti-β-actin (A5316, Sigma-Aldrich). Proteins were visualized by  
225 chemiluminescent detection with ECL and ECL Hyperfilm (Amersham). Differences in band  
226 intensity were quantified by densitometry using ImageJ.

227

228 **Immunoprecipitations.** Cells were lysed in either RIPA lysis buffer or IP lysis buffer (150mM  
229 NaCl, 50mM Tris pH 7.4, 1mM EDTA, 0.5% NP-40 substitute, supplemented with Halt™  
230 protease inhibitor cocktail (ThermoFisher Scientific)) at 4°C and passed through a G23 needle.  
231 Clarified lysates were immunoprecipitated with Flag M2 agarose (Sigma) overnight, washed in  
232 lysis buffer, and resuspended in Laemmli buffer for SDS-PAGE. Western blot analysis of  
233 immunoprecipitated proteins was performed as described above.

234 **Immunofluorescence.** Transfected Huh7-Lunet cells or infected NPCs were collected at 48 h  
235 and plated onto 22 × 22 mm #1.5 coverslips. Cells were fixed in 4% paraformaldehyde,  
236 permeabilized with 0.1% Triton X-100, and blocked in 3% bovine serum albumin. Cells were  
237 then immunostained with the indicated antibodies: anti-Strep Tag (Abcam, ab184224), anti-  
238 UPF1 (Abcam, ab109363), human anti-DENV mAb 1.6D (a generous gift from Sharon Isern and  
239 Scott Michael, Florida Gulf Coast University), which recognizes the ZIKV envelope protein, anti-  
240 dsRNA mAb J2 (SCICONS), and the appropriate fluorophore-conjugated secondary antibodies.  
241 Coverslips were mounted onto glass slides using Vectashield® Mounting Medium with DAPI  
242 (Vector Laboratories) and analyzed by fluorescence microscopy (Zeiss Axio Observer ZI) or  
243 confocal microscopy (Zeiss LSM 880). For acquiring high-resolution images, cells were imaged  
244 on the Zeiss LSM 880 with Airyscan using a 20x/0.8 or 63x/1.4 M27 oil immersion objective. A  
245 total of 15-20 (20x objective) or 60-80 (63x objective) Z-slices were acquired every 0.88 µm or  
246 0.15 µm, respectively. The resulting Z-stack was reconstructed and rendered in 3D using Imaris  
247 software (Bitplane). Viral dsRNA foci were reconstructed via the Imaris spot detection function,  
248 which provided an analysis of total number and mean volume of foci within a cell, for images  
249 acquired using the 20x objective. Strep-tagged ZIKV capsid, UPF1, and dsRNA channels  
250 acquired using the 63x objective were reconstructed using the Imaris surfaces package. The  
251 Imaris colocalization function was used to determine overlap of fluorescence. Thresholding for  
252 background fluorescence was determined by the Imaris automatic thresholding tool that utilizes  
253 the Costes approach<sup>26</sup>. The thresholded Mander's correlation coefficient (MCC) measures the  
254 fraction of voxels with fluorescence positive for one channel that also contain fluorescence from  
255 another channel. The MCC is typically more appropriate for analysis of three-dimensional  
256 colocalization<sup>27</sup>.

257

258 **Chemiluminescent RNA EMSA.** The cDNA for the full-length ZIKV genome was generated by  
259 ligating two DNA fragments containing the structural and nonstructural genes from a two-

260 plasmid system (pJW231 and pJW232), as previously described<sup>28</sup>. After ligation, the full-length  
261 cDNA was *in vitro* transcribed and biotinylated via the HiScribe™ T7 ARCA mRNA Kit (NEB)  
262 and Pierce™ RNA 3' End Biotinylation Kit (ThermoFisher Scientific). RNA EMSA was performed  
263 by incubating biotinylated ZIKV RNA with the indicated protein lysates and visualizing RNA-  
264 protein complex formation according to manufacturer's instructions (LightShift™  
265 Chemiluminescent RNA EMSA Kit, ThermoFisher Scientific).

266

267 **Statistical analysis.** Statistical differences between groups were analyzed using either a two-  
268 tailed unpaired Student's *t*-test or a two-tailed ratio paired Student's *t*-test, as stated in the figure  
269 legends. Hypergeometrical tests were used to calculate the probability of an overlap in gene  
270 dysregulation between ZIKV-infected NPCs and UPF1-depleted cells and to calculate the  
271 probability of ZIKV capsid bait-prey interactions. Data are represented as mean ± s.e.m.  
272 Statistical significance was defined as \**P* ≤ 0.05, \*\**P* ≤ 0.01, \*\*\**P* ≤ 0.001, and \*\*\*\**P* ≤ 0.0001.

273

274 **Acknowledgements.** The authors would like to thank all members of the Ott laboratory, as well  
275 as Roman Camarda and Marius Walter, for helpful discussions and advice throughout the  
276 preparation of this manuscript. We thank Chia-Lin Tsou, Mandy Muller (University of  
277 Massachusetts, Amherst), the Gladstone Stem Cell Core, and Meredith Calvert from the  
278 Gladstone Microscopy Core for technical assistance, and Ralf Bartenschlager (Heidelberg  
279 University), Gregory Ebel (Colorado State University), and Sharon Isern and Scott Michael  
280 (Florida Gulf Coast University) for reagents. We are grateful to Veronica Fonseca for  
281 administrative support, John Carroll and Teresa Roberts for graphical design, and to Eric  
282 Martens and Gary Howard for editorial assistance. This work was supported by NIH/NIAID  
283 F32AI112262 to P.S.S., NIH/NINDS R01 NS101996-01 to S.F., NIH/NIAID U19AI1186101 to  
284 N.J.K., DOD/DARPA HR0011-11-C-0094 (PROPHECY) to N.J.K., NIH/NIAID R01 AI097552 to  
285 M.O., and the James B. Pendleton Charitable Trust.



286

287 **Competing interests.** The authors declare no competing financial interests.

288

289 **Author contributions.** K.A.F., K.E.L., M.M.K., and P.S.S. designed, conducted, and analyzed  
290 the experiments. D.J. performed the bioinformatics analyses and provided graphical support.  
291 M.O. supervised, guided, and funded the project. S.T., M.D., J.A.K., S.F., and N.J.K. provided  
292 critical reagents and technical guidance. The manuscript was written by K.A.F., K.E.L., and  
293 M.O. with input from N.J.K.

294

## 295 **Figure Legends**

### 296 **Figure 1. The NMD pathway is disrupted during ZIKV infection.**

297 (a) Transcript levels of NMD substrates and housekeeping genes from Huh7 cells or NPCs  
298 mock-infected or infected with ZIKV strain P6-740 or the contemporary clinical isolate  
299 PRVABC59. Cells were infected at a multiplicity of infection (MOI) of 0.1 or 1 and harvested at  
300 48 hpi. Data are represented as mean  $\pm$  s.e.m. *P* values were calculated by unpaired Student's  
301 *t*-test. \**P*  $\leq$  0.05; \*\**P*  $\leq$  0.01; ns, not significant. *n* = 3 independent experiments.

302 (b) Venn diagram showing overlap of significantly upregulated genes associated with ZIKV  
303 infection of NPCs and UPF1 knockdown in HeLa cells. RNA-Seq analyses of mock-infected or  
304 ZIKV-infected NPCs harvested at 56 hpi and control siRNA-treated or UPF1 siRNA-treated  
305 HeLa TO cells harvested at 72 h post-transfection (hpt). The GeneProf hypergeometric  
306 probability calculator (<http://www.geneprof.org/GeneProf/tools/hypergeometric.jsp>) was then  
307 used to generate a hypergeometric *P* value. \*\*\*\**P*  $\leq$  0.0001.

308 (c) Transcript levels of housekeeping genes and select genes involved in cell cycle growth  
309 arrest and apoptosis that were identified in (b). Huh7 cells were mock-infected or infected with  
310 ZIKV PRVABC59 at an MOI of 0.1 or 1 and harvested at 48 hpi. Data are represented as mean



311 ± s.e.m. *P* values were calculated by unpaired Student's *t*-test. \**P* ≤ 0.05; \*\**P* ≤ 0.01; \*\*\**P* ≤  
312 0.001; ns, not significant. n= 3 independent experiments.

313

314 **Figure 2. The capsid protein of ZIKV interacts with the NMD pathway and downregulates**  
315 **UPF1.**

316 (a) Ugandan ZIKV capsid (Ug Cap, MR 766) and French Polynesian ZIKV capsid (Fp Cap,  
317 H/PF/2013) PPI maps that show significant enrichment for host NMD-associated factors  
318 (purple), as identified by AP-MS (SAINTq probability score > 0.9 and FDR < 0.05). Ten  
319 interactions between Fp Cap and host NMD factors (hypergeometrical test, *P* value =  $7.16 \times 10^{-$   
320  $10$ ) and eight interactions between Ug Cap and host NMD factors (*P* value =  $3.45 \times 10^{-7}$ ) were  
321 identified.

322 (b) Co-immunoprecipitation (co-IP) and western blot analysis of HEK293T cells transfected with  
323 vector or Flag-tagged ZIKV capsid (H/PF/2013, Asian lineage) and harvested at 48 hpt to  
324 immunoprecipitate endogenous UPF3B. The upper band detected in the IP Capsid blot  
325 represents a non-specific artifact.

326 (c) Co-IP and western blot analysis of HEK293T cells transfected with vector or Flag-tagged  
327 ZIKV capsid and harvested at 48 hpt to immunoprecipitate endogenous UPF1.

328 (d) Representative 3D confocal microscopy images of Huh7-Lunet cells transfected with vector  
329 or Strep-tagged ZIKV capsid. Cells were processed for immunostaining at 48 hpt and probed  
330 with antibodies against Strep-tag (turquoise) and endogenous UPF1 (purple). DAPI (blue) was  
331 used to stain the nuclei. Each channel was reconstructed digitally for visualization of the 3D  
332 colocalization. The thresholded Mander's correlation coefficient for ZIKV capsid was 0.57 (n =  
333 17), indicating that approximately 57% of the voxels positive for capsid fluorescence were also  
334 positive for UPF1 fluorescence. Scale bar represents 5 μm.

335

336 **Figure 3. UPF1 is post-transcriptionally downregulated during ZIKV infection.**

337 (a) Western blot analysis of UPF1 levels in mock-infected and ZIKV-infected (PRVABC59, MOI  
338 of 1) Huh7 cells harvested at 48 hpi, with  $\beta$ -actin and ZIKV envelope protein (ZIKV E) serving as  
339 loading and infection controls, respectively. Densitometric analyses were performed using  
340 ImageJ to quantify relative band intensities. Data are represented as mean  $\pm$  s.e.m. *P* values  
341 were calculated by unpaired Student's *t*-test.  $**P \leq 0.01$ . *n*= 3 independent experiments.

342 (b) Western blot analysis of UPF1 levels in mock-infected and ZIKV-infected (P6-740, MOI of 1)  
343 NPCs harvested at 48 hpi, with  $\beta$ -actin and ZIKV capsid protein (ZIKV C) serving as loading and  
344 infection controls, respectively. Densitometric analyses were performed using ImageJ to  
345 quantify relative band intensities. Data are represented as mean  $\pm$  s.e.m. *P* values were  
346 calculated by unpaired Student's *t*-test.  $***P \leq 0.001$ . *n*= 3 independent experiments using one  
347 NPC line.

348 (c) UPF1 transcript levels from Huh7 cells mock-infected or infected with ZIKV strain  
349 PRVABC59 at an MOI of 0.1 or 1 and harvested at 48 hpi. Data are represented as mean  $\pm$   
350 s.e.m. *P* values were calculated by unpaired Student's *t*-test. ns, not significant. *n*= 3  
351 independent experiments.

352 (d) UPF1 transcript levels from HEK293T cells transfected with vector or Strep-tagged ZIKV  
353 capsid (H/PF/2013, Asian lineage) and harvested at 48 hpt. Data are represented as mean  $\pm$   
354 s.e.m. *P* values were calculated by unpaired Student's *t*-test. ns, not significant. *n*= 3  
355 independent experiments.

356

#### 357 **Figure 4. UPF1 is a restriction factor of ZIKV.**

358 (a) Western blot analysis of UPF1 levels in NPCs transfected with non-targeting siRNA (siNT) or  
359 a pool of UPF1-specific siRNAs (siUPF1) at 96 hpt. Densitometric analyses were performed  
360 using ImageJ to quantify relative band intensities. Data are represented as mean  $\pm$  s.e.m. *P*  
361 value was calculated by unpaired Student's *t*-test.  $**P \leq 0.01$ . *n*= 3 independent experiments  
362 using one NPC line.

363 (b) ZIKV RNA levels in siNT-treated or siUPF1-treated NPCs infected with ZIKV strain  
364 PRVABC59 at an MOI of 0.1 or 1 and harvested at 48 hpi. Data are represented as mean  $\pm$   
365 s.e.m.  $P$  value was calculated by two-tailed ratio paired Student's  $t$ -test.  $***P \leq 0.001$ .  $n = 3$   
366 independent experiments using one NPC line.

367 (c) Released infectious virus from siNT-treated or siUPF1-treated, ZIKV-infected (MOI of 1)  
368 NPCs harvested at 48 hpi. Data are represented as mean  $\pm$  s.e.m.  $P$  value was calculated by  
369 unpaired Student's  $t$ -test.  $**P \leq 0.01$ .  $n = 3$  independent experiments using one NPC line.

370 (d) Infection rates of siNT-treated or siUPF1-treated, ZIKV-infected (MOI of 1) NPCs measured  
371 at 48 hpi. Fixed cells were subjected to the anti-DENV mAb 1.6D, which also recognizes the  
372 ZIKV envelope protein. Data are represented as mean  $\pm$  s.e.m.  $P$  value was calculated by two-  
373 tailed ratio paired Student's  $t$ -test.  $**P \leq 0.01$ .  $n = 3$  independent experiments using two NPC  
374 lines.

375 (e) Representative 3D confocal microscopy images of mock-infected or ZIKV-infected (MOI of 1)  
376 NPCs processed for immunostaining at 48 hpi. Cells were probed with antibodies against  
377 dsRNA (teal) and endogenous UPF1 (purple), with DAPI (blue) used to stain the nuclei. Each  
378 channel was reconstructed digitally for visualization of the 3D colocalization. The thresholded  
379 Mander's correlation coefficient for ZIKV dsRNA was 0.54, indicating that approximately 54% of  
380 the voxels positive for dsRNA fluorescence were also positive for UPF1 fluorescence.  $n = 3$   
381 independent experiments using one NPC line, with 4 cells analyzed per condition for each  
382 experiment. Scale bar represents 5  $\mu\text{m}$ .

383 (f) Chemiluminescent RNA EMSA of biotinylated *in vitro* transcribed ZIKV RNA with protein  
384 lysate from vector-transfected or UPF1-transfected HEK293T cells in the absence or presence  
385 of specific competitor unlabeled ZIKV RNA. Results are representative of at least three  
386 independent experiments.

387 (g) Model of the interaction between the capsid protein of ZIKV and UPF1 of the NMD pathway.

388

389 **Supplemental Figure 1. ZIKV dsRNA foci number and volume are not altered in UPF1-**  
390 **depleted NPCs.**

391 (a) Representative confocal microscopy images of a ZIKV-infected, siNT-treated NPC or a  
392 ZIKV-infected, siUPF1-treated NPC with the nuclei stained with DAPI (blue) and ZIKV dsRNA  
393 foci stained with the anti-dsRNA mAb J2 (teal). 3D image rendering and reconstructed dsRNA  
394 foci were produced using the Imaris spot detection function. Scale bar represents 2  $\mu\text{m}$ .

395 (b) Number of dsRNA foci were averaged for each cell. Data are represented as mean  $\pm$  s.e.m.  
396 *P* value was calculated by two-tailed ratio paired Student's *t*-test. ns, not significant. *n* = 3  
397 independent experiments using two NPC lines, with 3-10 cells analyzed per condition for each  
398 experiment.

399 (c) Measurement of dsRNA foci volume were averaged for each cell. Data are represented as  
400 mean  $\pm$  s.e.m. *P* value was calculated by two-tailed ratio paired Student's *t*-test. ns, not  
401 significant. *n* = 3 independent experiments using two NPC lines, with 3-10 cells analyzed per  
402 condition for each experiment.

403 **References**

- 404 1. Li, C. *et al.* Zika Virus Disrupts Neural Progenitor Development and Leads to Microcephaly in  
405 Mice. *Cell Stem Cell* **19**, 120-126 (2016).
- 406 2. Cugola, F. R. *et al.* The Brazilian Zika virus strain causes birth defects in experimental  
407 models. *Nature* **534**, 267-271 (2016).
- 408 3. Miner, J. J. *et al.* Zika Virus Infection during Pregnancy in Mice Causes Placental Damage  
409 and Fetal Demise. *Cell* **165**, 1081-1091 (2016).
- 410 4. Silver, D. L. *et al.* The exon junction complex component Magoh controls brain size by  
411 regulating neural stem cell division. *Nat. Neurosci.* **13**, 551-558 (2010).
- 412 5. Mao, H., McMahon, J. J., Tsai, Y., Wang, Z. & Silver, D. L. Haploinsufficiency for Core Exon  
413 Junction Complex Components Disrupts Embryonic Neurogenesis and Causes p53-Mediated  
414 Microcephaly. *PLoS Genetics* **12**, e1006282 (2016).
- 415 6. Mao, H. *et al.* Rbm8a haploinsufficiency disrupts embryonic cortical development resulting in  
416 microcephaly. *J. Neurosci.* **35**, 7003-7018 (2015).
- 417 7. Brogna, S. & Wen, J. Nonsense-mediated mRNA decay (NMD) mechanisms. *Nature*  
418 *Structural & Molecular Biology* **16**, 107-113 (2009).
- 419 8. Jerome M Molleston & Sara Cherry. Attacked from All Sides: RNA Decay in Antiviral  
420 Defense. *Viruses* **9**, 2 (2017).
- 421 9. Rigby, R. E. & Rehwinkel, J. RNA degradation in antiviral immunity and autoimmunity. *Trends*  
422 *in Immunology* **36**, 179-188 (2015).
- 423 10. Fauci, A. S. & Morens, D. M. Zika Virus in the Americas--Yet Another Arbovirus Threat. *N.*  
424 *Engl. J. Med.* **374**, 601-604 (2016).
- 425 11. Rasmussen, S. A., Jamieson, D. J., Honein, M. A. & Petersen, L. R. Zika Virus and Birth  
426 Defects — Reviewing the Evidence for Causality. *N. Engl. J. Med.* **374**, 1981-1987 (2016).
- 427 12. Balistreri, G., Bognanni, C. & Mühlemann, O. Virus Escape and Manipulation of Cellular  
428 Nonsense-Mediated mRNA Decay. *Viruses* **9** (2017).

- 429 13. Balistreri, G. *et al.* The host nonsense-mediated mRNA decay pathway restricts Mammalian  
430 RNA virus replication. *Cell Host Microbe* **16**, 403-411 (2014).
- 431 14. Ramage, H. R. *et al.* A combined proteomics/genomics approach links hepatitis C virus  
432 infection with nonsense-mediated mRNA decay. *Mol. Cell* **57**, 329-340 (2015).
- 433 15. Hug, N., Longman, D. & Cáceres, J. F. Mechanism and regulation of the nonsense-  
434 mediated decay pathway. *Nucleic Acids Res.* **44**, 1483-1495 (2016).
- 435 16. Tang, H. *et al.* Zika Virus Infects Human Cortical Neural Progenitors and Attenuates Their  
436 Growth. *Cell Stem Cell* **18**, 587-590 (2016).
- 437 17. Tani, H. *et al.* Identification of hundreds of novel UPF1 target transcripts by direct  
438 determination of whole transcriptome stability. *RNA Biology* **9**, 1370-1379 (2012).
- 439 18. Jauhiainen, A. *et al.* Distinct cytoplasmic and nuclear functions of the stress induced protein  
440 DDIT3/CHOP/GADD153. *PLoS ONE* **7**, e33208 (2012).
- 441 19. Salvador, J. M., Brown-Clay, J. D. & Fornace, A. J. Gadd45 in stress signaling, cell cycle  
442 control, and apoptosis. *Adv. Exp. Med. Biol.* **793**, 1-19 (2013).
- 443 20. Klema, V. J., Padmanabhan, R. & Choi, K. H. Flaviviral Replication Complex: Coordination  
444 between RNA Synthesis and 5'-RNA Capping. *Viruses* **7**, 4640-4656 (2015).
- 445 21. Developmental alterations in Huntington's disease neural cells and pharmacological rescue  
446 in cells and mice. *Nat. Neurosci.* **20**, 648-660 (2017).
- 447 22. Jäger, S. *et al.* Purification and characterization of HIV-human protein complexes. *Methods*  
448 **53**, 13-19 (2011).
- 449 23. Cox, J. *et al.* Accurate proteome-wide label-free quantification by delayed normalization and  
450 maximal peptide ratio extraction, termed MaxLFQ. *Mol. Cell Proteomics* **13**, 2513-2526 (2014).
- 451 24. Cox, J. & Mann, M. MaxQuant enables high peptide identification rates, individualized  
452 p.p.b.-range mass accuracies and proteome-wide protein quantification. *Nat. Biotechnol.* **26**,  
453 1367-1372 (2008).

- 454 25. Teo, G. *et al.* SAINTq: Scoring protein-protein interactions in affinity purification - mass  
455 spectrometry experiments with fragment or peptide intensity data. *Proteomics* **16**, 2238-2245  
456 (2016).
- 457 26. Costes, S. V. *et al.* Automatic and quantitative measurement of protein-protein colocalization  
458 in live cells. *Biophys. J.* **86**, 3993-4003 (2004).
- 459 27. Dunn, K. W., Kamocka, M. M. & McDonald, J. H. A practical guide to evaluating  
460 colocalization in biological microscopy. *Am J Physiol Cell Physiol* **300**, C742 (2011).
- 461 28. Weger-Lucarelli, J. *et al.* Development and Characterization of Recombinant Virus  
462 Generated from a New World Zika Virus Infectious Clone. *J. Virol.* **91** (2017).
- 463

**Figure 1**

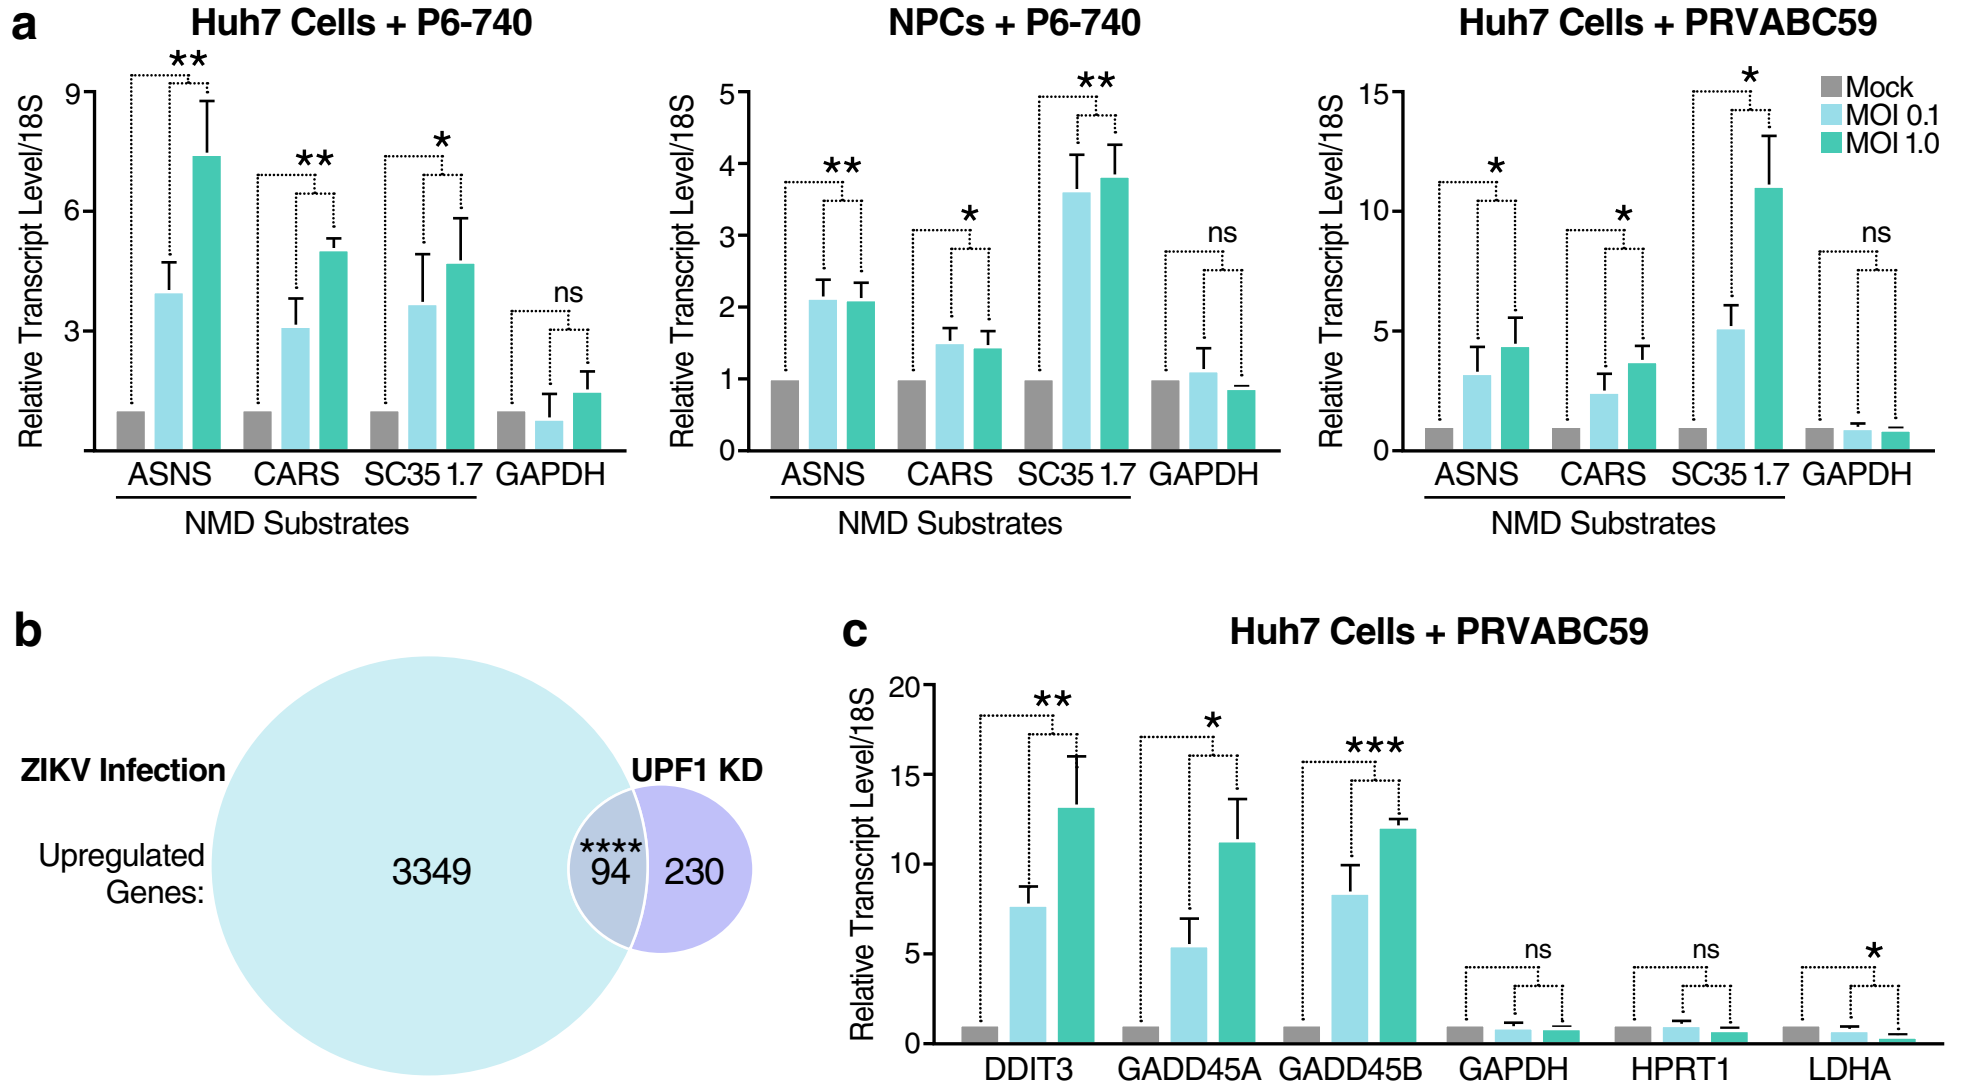



Figure 2

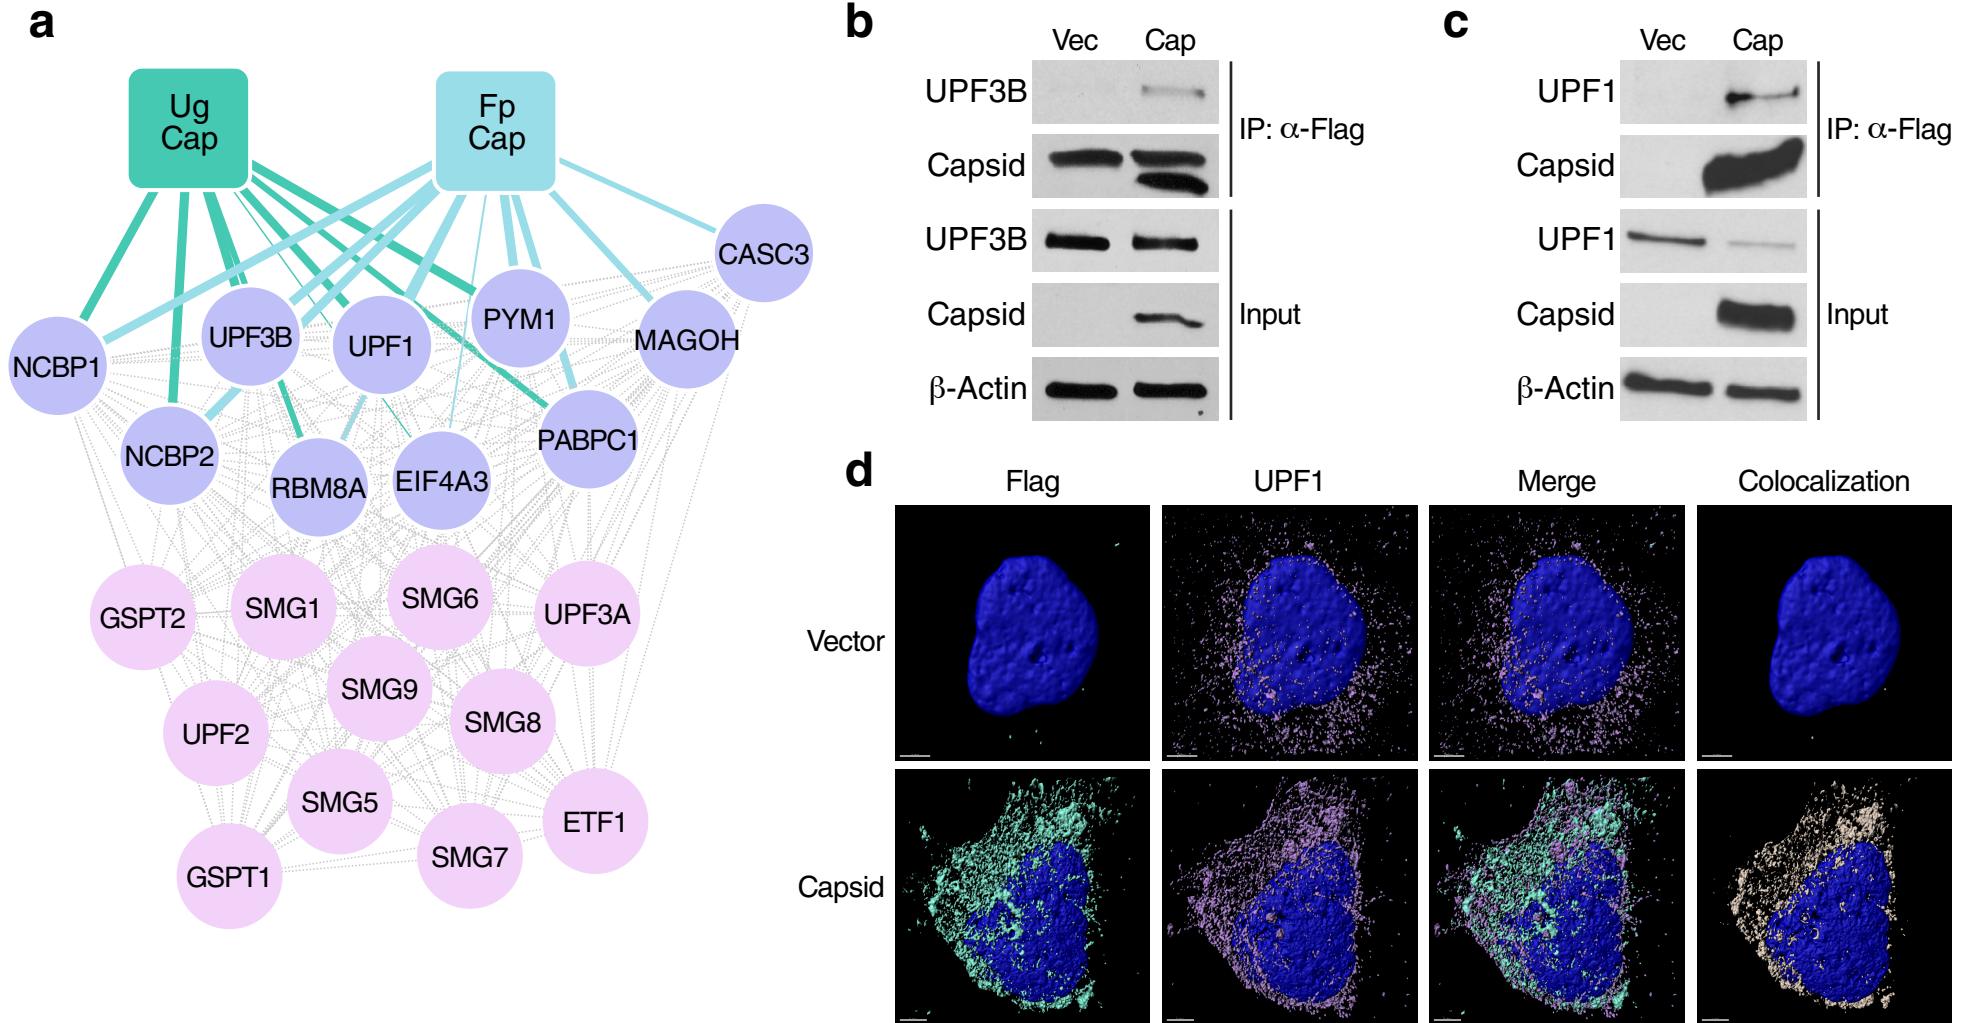

Figure 3

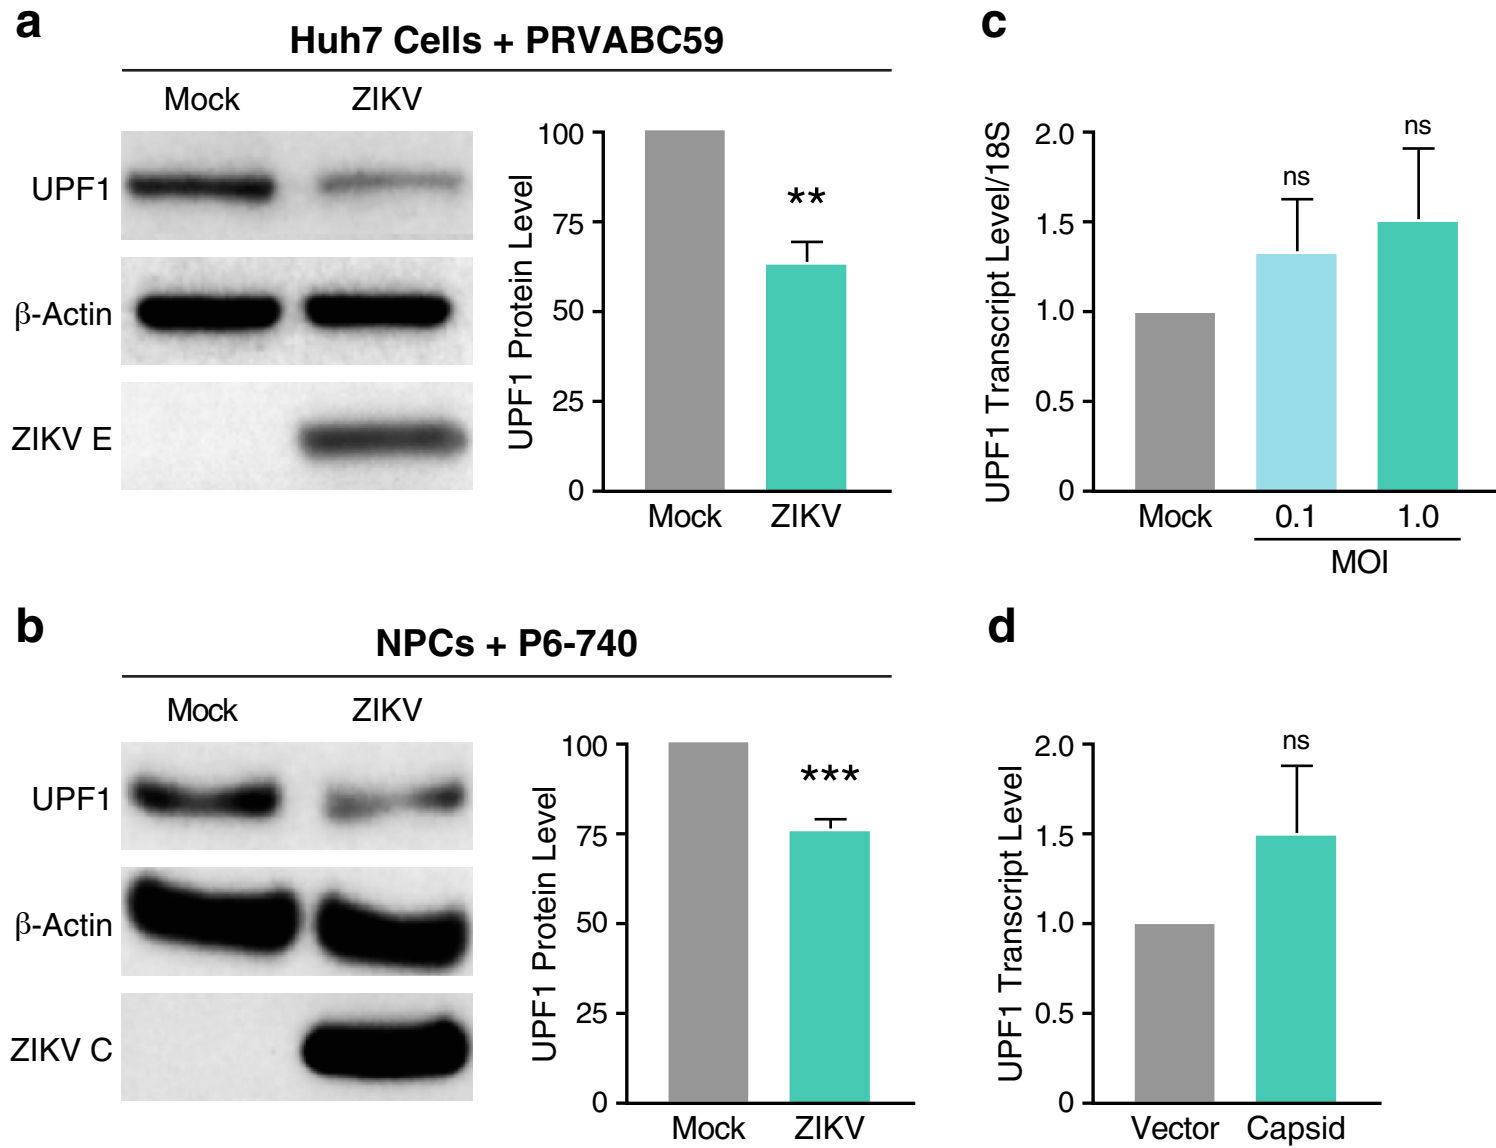

**Figure 4**

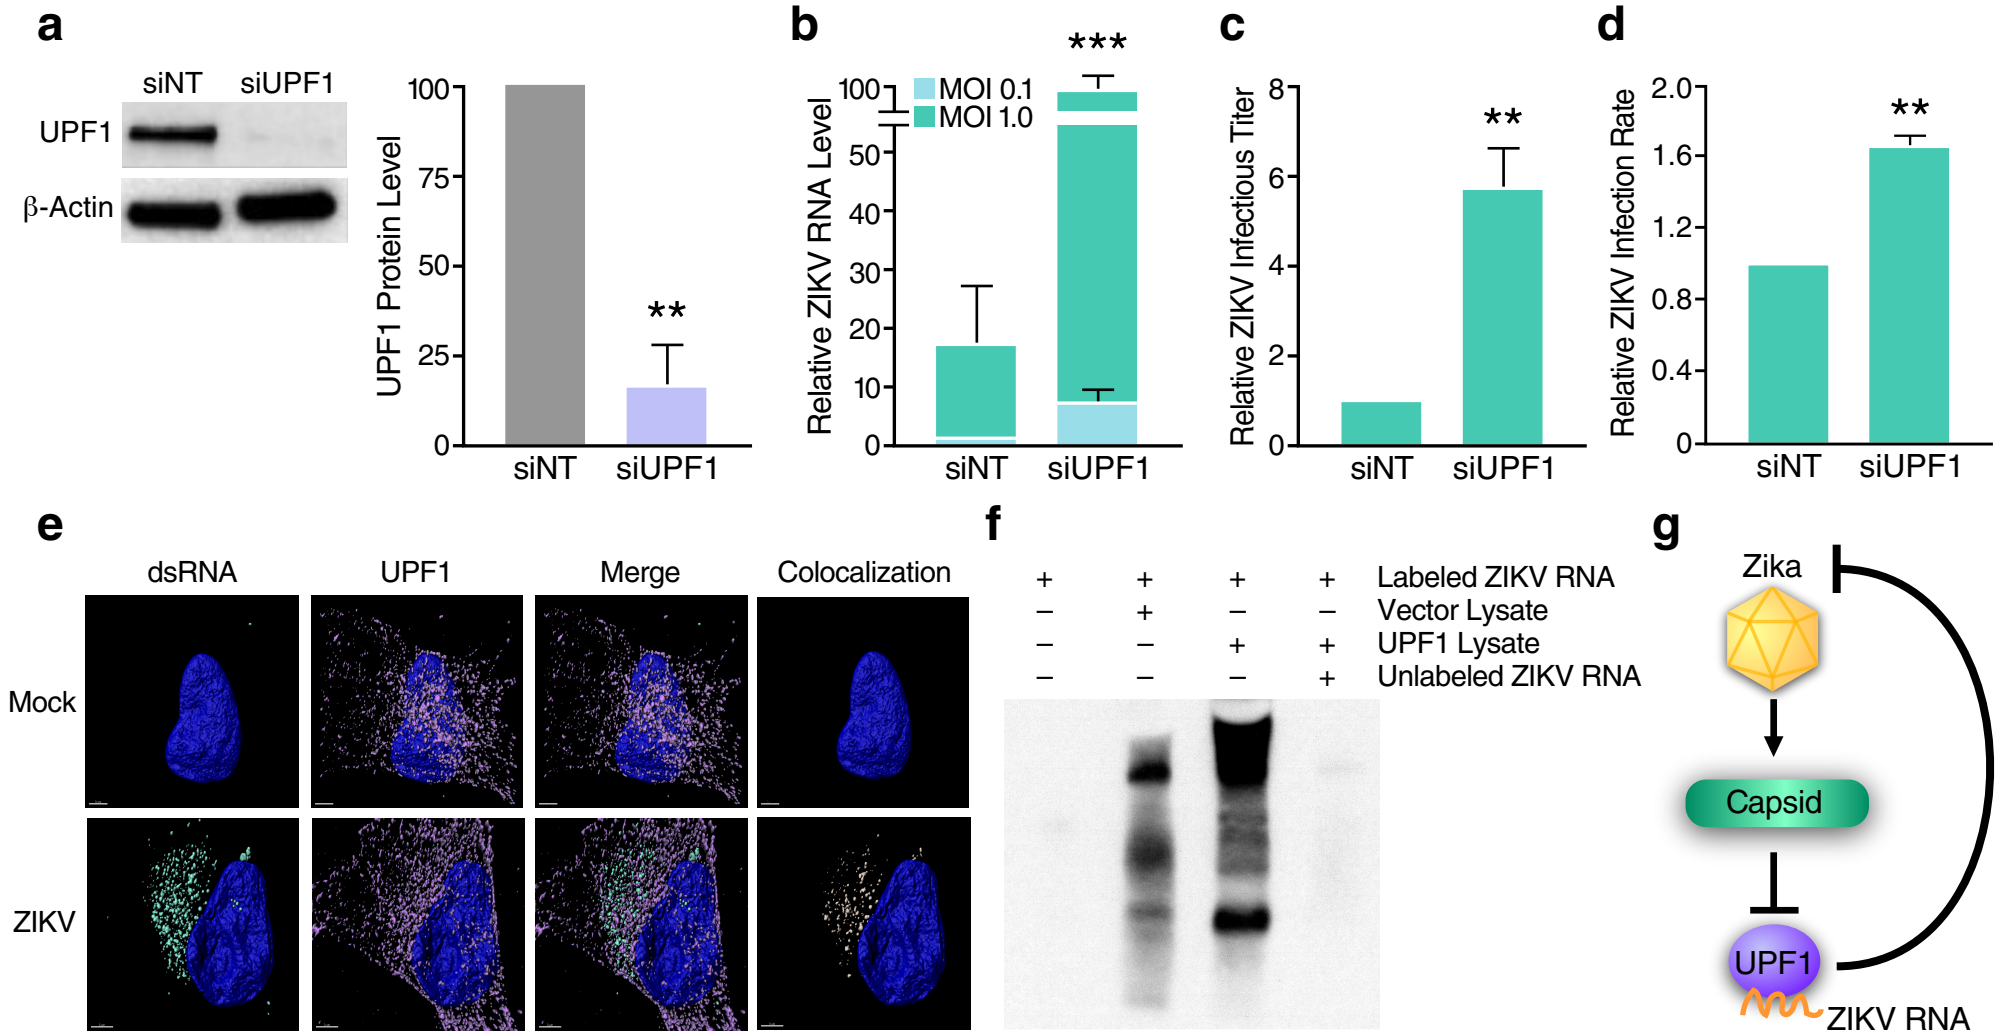

Source: https://www.biorxiv.org/content/10.1101/290296v3.full.pdf
